# Supplementary material for: Effects of Compound Chinese Herbal Medicine Additive on Growth Performance and Gut Microbiota Diversity of Zi Goose
Source: MDPI journal article supplement (doi:10.3390/ani12212942), 2022-10-26
Supplement: s1 [file s1]

**Supplementary Table S1.** Sequencing depth of caecal flora of Zi geese in control and experimental group

| <b>Items</b> | <b>Raw PE</b> | <b>Clean Tags</b> | <b>Effective Tags</b> | <b>Q20</b> | <b>Q30</b> |
|--------------|---------------|-------------------|-----------------------|------------|------------|
| CON1         | 80490         | 78875             | 64747                 | 97.66      | 92.83      |
| CON2         | 92597         | 90753             | 69956                 | 97.67      | 92.89      |
| CON3         | 87755         | 86498             | 65819                 | 97.66      | 92.80      |
| CON4         | 83998         | 82255             | 64425                 | 97.69      | 92.81      |
| CON5         | 82005         | 80877             | 64407                 | 97.70      | 92.87      |
| CCHMA1       | 89122         | 86864             | 67383                 | 97.73      | 92.86      |
| CCHMA2       | 80686         | 79010             | 62887                 | 97.81      | 93.11      |
| CCHMA3       | 88782         | 87443             | 69751                 | 97.65      | 92.89      |
| CCHMA4       | 88607         | 87045             | 69586                 | 97.72      | 92.91      |
| CCHMA5       | 96284         | 95138             | 70977                 | 97.90      | 93.25      |

Abbreviation: Raw PE, the original PE reads; Clean Tags, sequences after filtering low quality and short length; Effective Tags, the final Tag sequence used for subsequent analysis after filtering chimeras; Q20, the percentage of bases with base quality value greater than 20 (sequencing error rate less than 1%) in Effective Tags; Q30, the percentage of bases with base quality value greater than 30 (sequencing error rate less than 1%) in Effective Tags.
